# Supplementary material for: SOX2 O-GlcNAcylation alters its protein-protein interactions and genomic occupancy to modulate gene expression in pluripotent cells
Source: eLife journal article supplement (doi:10.7554/elife.10647), 2016-03-07
Supplement: supp [file elife-10647-supp-v1.zip]

Archive with 15 entries (15 files):
- elife_poa_e10647_Figure_1_figure_supplement_2.pdf
- elife_poa_e10647_Figure_2_figure_supplement_1.pdf
- elife_poa_e10647_Figure_6_figure_supplement_2.pdf
- elife_poa_e10647_Figure_1_figure_supplement_3.pdf
- elife_poa_e10647_Figure_3_figure_supplement_1.pdf
- elife_poa_e10647_Figure_1_figure_supplement_7.pdf
- elife_poa_e10647_Supplementary_File_1.xlsx
- elife_poa_e10647_Figure_3_figure_supplement_2.pdf
- elife_poa_e10647_Figure_4_figure_supplement_1.pdf
- elife_poa_e10647_Figure_1_figure_supplement_6.pdf
- elife_poa_e10647_Figure_6_figure_supplement_1.pdf
- elife_poa_e10647_Figure_1_figure_supplement_4.pdf
- elife_poa_e10647_Figure_1_figure_supplement_5.pdf
- elife_poa_e10647_Figure_3_figure_supplement_3.pdf
- elife_poa_e10647_Figure_1_figure_supplement_1.pdf
