# Supplementary material for: SOX2 O-GlcNAcylation alters its protein-protein interactions and genomic occupancy to modulate gene expression in pluripotent cells
Source: eLife journal article supplement (doi:10.7554/elife.10647), 2016-03-07

Figure 3-figure supplement 1

### A. Derivation of inducible Sox2 parental line(2TS22C)

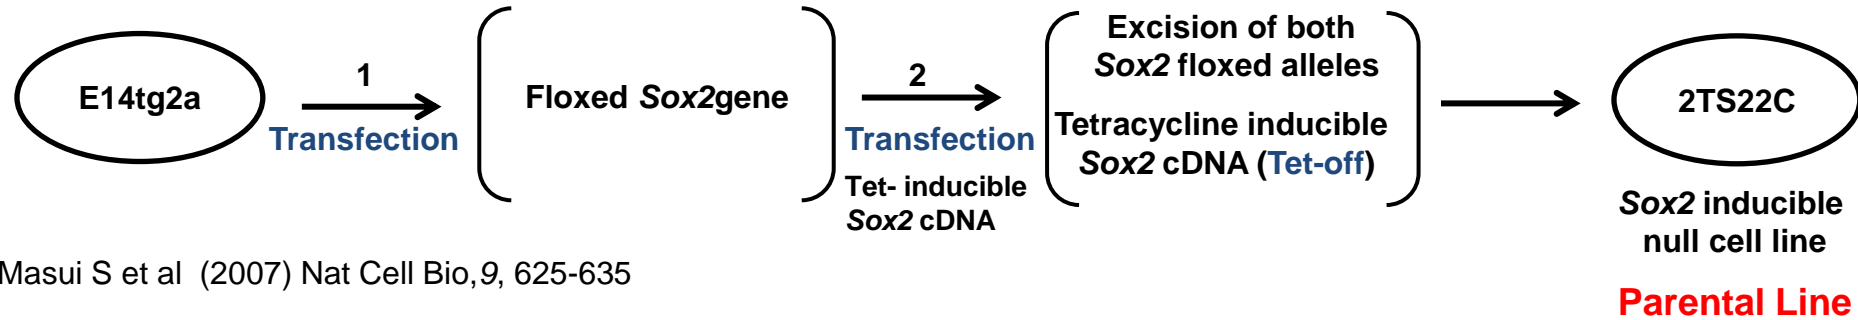

Masui S et al (2007) Nat Cell Bio,9, 625-635

### B. Derivation of fSOX2-Tg and fS248A-Tg mESCs

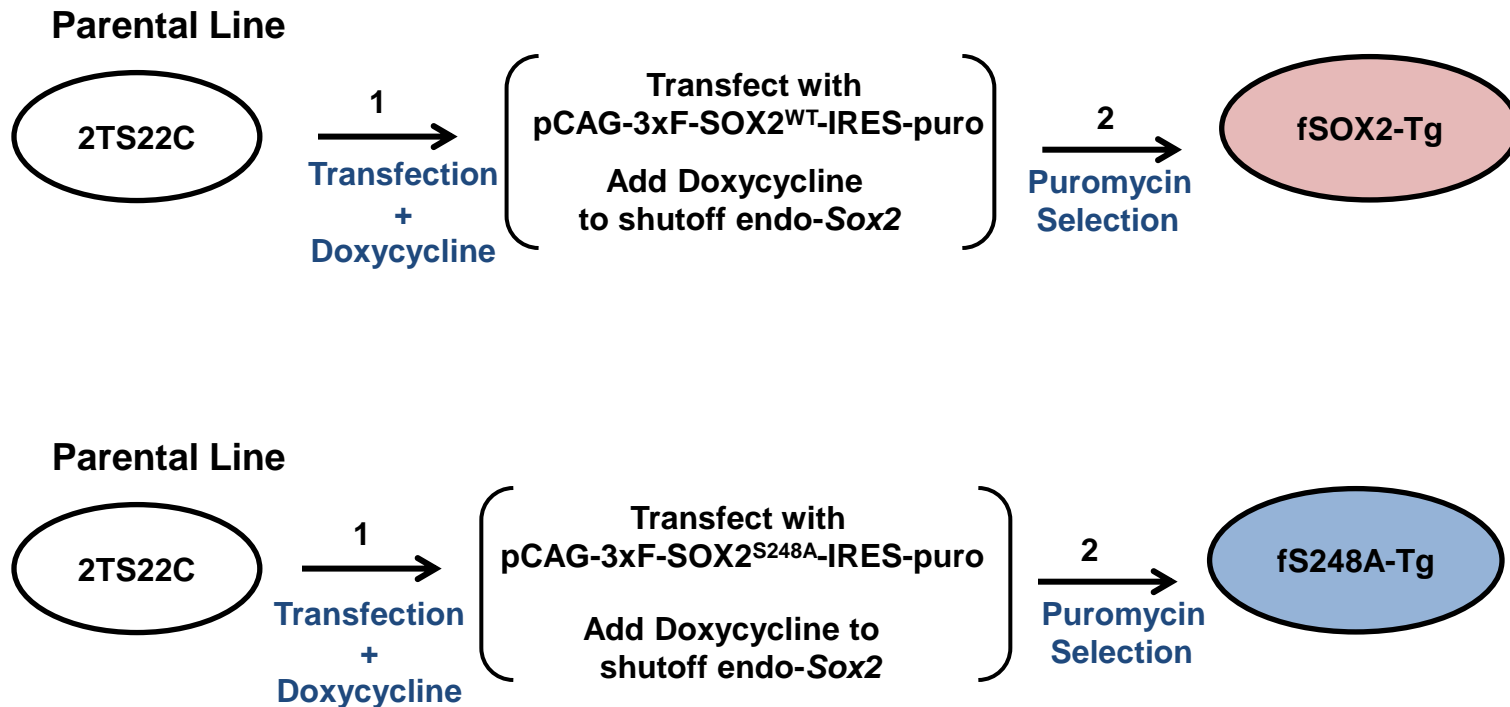

Supplement: supp [file elife-10647-supp-v1.zip › elife_poa_e10647_Figure_3_figure_supplement_1.pdf]
