# Supplementary material for: SOX2 O-GlcNAcylation alters its protein-protein interactions and genomic occupancy to modulate gene expression in pluripotent cells
Source: eLife journal article supplement (doi:10.7554/elife.10647), 2016-03-07
Supplement: supp [file elife-10647-supp-v1.zip › elife_poa_e10647_Figure_6_figure_supplement_1.pdf]

Figure 6- figure supplement 1

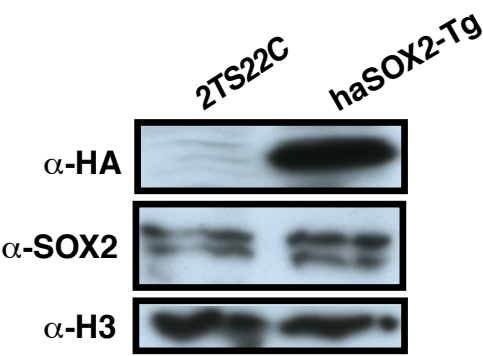

| m/z      | z | ppm | DB peptide       | Variable Mod | Intensity | Area  | Score | Expect  |
|----------|---|-----|------------------|--------------|-----------|-------|-------|---------|
| 635.6363 | 3 | 5.8 | SEASSPPVVTSSSHSR | HexNAc@1=8   | 27646     | 798.8 | 46.1  | 1.9E-09 |
| 567.9421 | 3 | 4.7 | SEASSPPVVTSSSHSR |              | 24720     | 699.8 | 42.8  | 1.9E-07 |
