# Supplementary material for: SOX2 O-GlcNAcylation alters its protein-protein interactions and genomic occupancy to modulate gene expression in pluripotent cells
Source: eLife journal article supplement (doi:10.7554/elife.10647), 2016-03-07
Supplement: supp [file elife-10647-supp-v1.zip › elife_poa_e10647_Supplementary_File_1.xlsx]

## Sheet: TableS1_GeneExpressionProfiles
Differentailly expressed genes between fSOX2-Tg and fS248A-Tg cells
GeneSymbol	p-value	FCAbsolute	regulation
Zfp707	0.042674	1.64348	down
Eno2	0.0378943	2.07403	down
4930579G22Rik	0.012479	2.51886	down
Il20	0.0236009	1.99198	down
Apoe	0.0397524	1.50996	down
5430427O19Rik	0.0422467	3.13181	down
Ntrk3	0.0146728	1.60484	down
Praf2	0.0296954	2.27666	down
Lpl	0.0129336	2.18601	down
Fam189a1	0.0457631	2.12035	down
Zfhx2	0.0185667	1.85095	down
Gjb6	0.0195655	1.54763	down
Gm6904	0.0311068	2.19813	down
Gm5634	0.000960066	2.32812	down
Zadh2	0.0355091	1.9694	down
Gm13251	0.0131573	2.12481	down
Mical2	0.0468859	1.50212	down
Rhbdl3	0.0426543	2.62688	down
Sirpb1b	0.0371301	1.91369	down
D930020B18Rik	0.000535651	1.62288	down
Lao1	0.00316819	2.00302	down
Olfr1340	0.0235831	3.27107	down
Plp2	0.00945548	1.518	down
Vmn2r56	0.0162481	1.66577	down
Fam172a	0.0498656	1.56487	down
Slc13a3	0.0392124	2.11328	down
Pck2	0.0303492	2.0011	down
Icam1	0.0316229	1.53904	down
A830018L16Rik	0.0415705	3.30763	down
Ptcra	0.020681	1.60216	down
Gm3604	0.00865279	1.79797	down
Pld4	0.0395667	2.19064	down
Ttll3	0.0406423	2.96945	down
Atg4c	0.0363664	4.24584	down
Fam75d3	0.0206819	2.17047	down
Nmbr	0.0312732	2.20473	down
Kcnc2	0.0193592	1.76442	down
Rab40b	0.0477508	1.8331	down
Slc1a1	0.0211323	1.62231	down
Akr1d1	0.0121504	2.69871	down
Psg16	0.0297026	2.14773	down
Gbx1	0.0162526	1.76041	down
Gnb5	0.0472849	1.59454	down
Hoxc13	0.0104941	2.46745	down
Klra22	0.0110747	2.20035	down
Cdh16	0.00550984	2.30281	down
Apob	0.0203197	3.05668	down
Dcaf6	0.0249472	2.12852	down
Slc1a2	0.0167334	3.37126	down
P2ry1	0.00317428	1.64836	down
Rnf183	0.0419479	4.43671	down
T2	0.0243325	2.79134	down
Dlx4	0.0408663	1.78212	down
Ptgir	0.048501	1.58263	down
2010106G01Rik	0.00584781	1.82207	down
Plcb3	0.00258595	1.9182	down
6430598A04Rik	0.0476999	2.06012	down
Ccdc89	0.0081802	1.70821	down
Adora2b	0.0455465	1.9761	down
Wfdc12	0.00878377	1.71525	down
Olfr129	0.0325329	1.76658	down
Ccdc38	0.0325536	2.00762	down
Ccdc79	0.0175864	1.76774	down
Fabp1	0.0384097	2.06382	down
Rbpj	0.0383616	1.89766	down
Trim43b	0.024381	1.51473	down
Lrp8	0.0226927	1.92609	down
Pclo	0.00673931	1.5832	down
Irak2	0.0359104	1.50267	down
Gm14725	0.0287068	1.75534	down
Ucp3	0.0398838	2.70585	down
Ell3	0.0280877	1.53796	down
2310050C09Rik	0.00296726	1.57968	down
Olfr166	0.0443145	1.5313	down
Olfr1306	0.0301675	2.36173	down
LOC100039810	0.0378327	1.85871	down
Ano1	0.0346331	2.53658	down
Olfr586	0.0273075	1.8405	down
Galnt4	0.0447165	1.59431	down
Gpm6b	0.0421024	1.8769	down
Gas1	0.0332914	2.07145	down
C2cd4c	0.0301374	1.62619	down
Fut10	0.0282276	1.97452	down
Caprin1	0.0455009	1.54123	down
Nat8l	0.0442095	2.04597	down
Eras	0.0319138	1.59886	down
Sphk2	0.0317669	1.5549	down
Olfr59	0.0347357	1.63899	down
Amy2b	0.0306672	4.05257	down
Ube2o	0.00490197	1.63841	down
Gm12794	0.00518188	1.9761	down
Krtap2-4	0.0336711	2.55966	down
Igsf21	0.0459997	3.28643	down
Gm10324	0.0212726	1.80935	down
Ldhd	0.0450089	1.58711	down
Trp53inp2	0.0340689	1.74051	down
Usp27x	0.030673	2.53607	down
Elovl6	0.0302344	2.23981	down
Cramp1l	0.0143906	1.63618	down
Cdc25b	0.0479138	1.67075	down
AI646023	0.0165573	3.07394	down
Olfr1348	0.0183046	3.20433	down
Twist1	0.00987231	1.64237	down
Txndc2	0.0202291	1.5579	down
Fam179a	0.00968449	3.17909	down
Olfr1423	0.0145784	2.19878	down
Pramef6	0.0478188	1.81737	down
Prdm13	0.0306059	1.80535	down
Dusp28	0.00595098	1.50001	down
Cnot6l	0.00126004	1.83199	down
Loxhd1	0.0191366	3.41643	down
Hs6st2	0.032518	1.76673	down
Ddit3	0.0397486	1.57194	down
Lelp1	0.0299905	1.94902	down
Atp2a2	0.0392775	1.60286	down
E230025N22Rik	0.0321339	3.36742	down
Olfr508	0.000533328	3.26668	down
1700017B05Rik	0.00119504	1.53942	down
Fthl17	0.0175948	2.19491	down
Pde1c	0.0340087	3.22227	down
Vamp5	0.00857613	1.58367	down
Dach2	0.0216109	1.56867	down
Egam-1c	0.0319491	1.71107	down
Atp5s	0.0185424	1.56849	down
Ddo	0.0175163	2.23729	down
40607	0.0281759	1.54279	down
AA792892	0.0213337	2.23918	down
1700001C19Rik	0.0101351	1.88921	down
Loxl1	0.0318481	1.98644	down
Fshr	0.0413758	1.52854	down
Nmnat3	0.0325165	2.5973	down
Crem	0.0291272	1.5353	down
Gjc3	0.0278092	1.51392	down
Gpkow	0.0433781	1.99669	down
Abcc10	0.0488229	1.5192	down
Frem3	0.024506	4.59485	down
Alb	0.0182104	3.02422	down
Cyp2g1	0.00390945	1.87648	down
Gcet2	0.0366264	1.51036	down
Got1	0.00578198	1.50499	down
Tarm1	0.0202504	2.25057	down
Golga7b	0.0329682	1.59688	down
Cadm2	0.00785799	1.86822	down
Olfr655	0.000442581	1.50168	down
Pygo1	0.0151162	1.79931	down
Klhl25	0.0365966	1.91194	down
Gpr81	0.00805786	2.28525	down
Lmcd1	0.0402142	2.23274	down
Asb10	0.0416976	2.70284	down
Ppp1r3c	0.049786	2.64665	down
Nexn	0.0228325	2.02471	down
Mpl	0.0114591	1.57244	down
Tmem90b	0.0377897	1.79009	down
Arpp19	0.00865181	2.01837	down
Pctp	0.0483491	1.87885	down
Tmprss11d	0.032872	1.84626	down
BC021785	0.0249133	2.4708	down
D1Ertd622e	0.021185	1.79709	down
Gm2799	0.0271633	2.37444	down
Pou4f2	0.00520307	1.80652	down
Il1f5	0.0478464	1.79493	down
Il9	0.0104887	2.10216	down
Tmem52	0.03492	1.64866	down
Kcnip3	0.021537	2.18618	down
Nnmt	0.0302365	3.47707	down
Lamp2	0.0470133	2.21092	down
Zdhhc23	0.0112952	1.79051	down
Gm70	0.0498488	1.69798	down
BC048679	0.0460127	1.58303	down
Dnajc6	0.00940048	1.88305	down
Ttc30a2	0.0362058	1.51247	down
Cacna1i	0.0141915	4.29489	down
Sox3	0.00529813	1.73683	down
Defb36	0.000560904	1.91596	down
Gpcpd1	0.0190356	1.76771	down
Ramp1	0.0466369	1.62566	down
Il11ra1	0.0417806	3.62551	down
Olfr1316	0.00979897	2.38339	down
Abi3	0.0493297	4.59271	down
Coq10a	0.0449989	2.16655	down
Inca1	0.0187053	1.56233	down
Gpr19	0.0350497	1.68042	down
Gm6654	0.0106016	1.84981	down
Ankrd6	0.025662	1.72154	down
Creb3l1	0.0441799	2.0321	down
Mesp2	0.0435722	2.27907	down
Nhlrc4	0.0101233	3.62567	down
Carf	0.00778203	1.65961	down
Scd1	0.0298429	1.67401	down
Olfr1500	0.0352808	3.40325	down
1700016C15Rik	0.0483597	1.7821	down
Sephs2	0.0105421	1.67077	down
Fgd2	0.0165227	2.03269	down
LOC100041256	0.00741253	2.25461	down
Apobec2	0.00992195	1.79313	down
Fam184a	0.0362859	3.65111	down
Eef1a1	0.0305703	2.39255	down
Ckmt2	0.0198789	1.92555	down
Klra12	0.00390319	1.73949	down
Gramd1a	0.0304156	1.58104	down
Adrbk2	0.019428	3.60436	down
Gpr137b	0.0227505	1.78022	down
Arhgap26	0.0473252	2.1242	down
Mrpl21	0.0217435	1.57113	down
Pxt1	0.0361602	2.01919	down
Gdf15	0.0333734	2.58446	down
Nudt11	0.0342819	2.09223	down
Lhx1	0.0297457	1.53723	down
Epsti1	0.0069065	2.30596	down
Col5a3	0.0453599	3.0511	down
B230120H23Rik	0.0334452	2.1307	down
D630003M21Rik	0.0405537	2.26131	down
Tmem86a	0.0163431	1.74387	down
Ssxb3	0.00472793	2.7289	down
Scara5	0.008291	2.96436	down
Gm14347	0.0171262	2.13296	down
Car1	0.0264778	1.52348	down
Zscan4e	0.0397148	2.34011	down
Gm14511	0.00298002	2.32247	down
Ttk	0.0303573	1.78006	down
Slc32a1	0.00407208	4.13269	down
Ssxb8	0.0172046	4.81203	down
Lag3	0.049112	1.6717	down
Llgl2	0.049456	2.33632	down
Kctd12	0.0136045	1.97235	down
Pdzd2	0.0238012	2.0377	down
Barhl2	0.0171393	1.90803	down
Ankrd52	0.0217664	1.8537	down
Gipc2	0.0211617	1.52607	down
Armcx3	0.0082236	1.88434	down
Cypt15	0.0494509	3.58326	down
Aqp6	0.0280403	3.3178	down
Lmo1	0.0189345	1.88796	down
Ccdc142	0.0307982	2.1212	down
Rgs14	0.0198269	1.53333	down
Olfr287	0.0124549	2.11552	down
Rap1gap2	0.000337066	2.16824	down
Trp53rk	0.0469062	2.18493	down
Gm14345	0.0499683	1.97511	down
1700039E15Rik	0.00541671	2.03936	down
Gm6878	0.0046798	4.36027	down
Elovl3	0.0400611	1.93263	down
Olfr1471	0.039344	2.35779	down
Aspg	0.0309518	1.92303	down
Dub1a	0.0249521	2.6836	down
Fa2h	0.0118199	1.93438	down
4930408F14Rik	0.0166401	2.59921	down
Neu4	0.0166355	1.54208	down
Nlrp1b	0.0312374	2.62278	down
Smad6	0.0340152	1.58235	down
Pnpla1	0.00768893	1.72168	down
Sult2a6	0.0074725	3.07526	down
Cmbl	0.0346926	2.18809	down
Skap1	0.0253824	1.71342	down
1110032F04Rik	0.027759	2.61519	down
Abcg1	0.0415648	1.84724	down
Zfp426	0.0349614	1.75942	down
Smap1	0.0369251	1.60078	down
Ssxb9	0.0155953	3.40877	down
Mgat5	0.000895906	2.05999	down
Bcan	0.0322602	3.836	down
Cyp7b1	0.0374805	1.89775	down
Gm13119	0.00324548	1.52603	down
Cep110	0.0494386	1.5373	down
Prr15l	0.01092	2.31285	down
Olfr665	0.0117247	4.08763	down
Ankrd56	0.041577	2.0795	down
Dhrs7	0.0164903	1.64772	down
Yipf6	0.0305258	1.72098	down
Cst6	0.0141325	1.74575	down
E130304F04Rik	0.0452127	1.77177	down
Sash3	0.0253423	2.02616	down
Lman1	0.0170791	1.59683	down
Olfr617	0.0469819	2.2537	down
Nfam1	0.014699	1.50557	down
Dcaf12l2	0.0151085	1.68892	down
Mamstr	0.0161669	1.7072	down
Ppp2r2c	0.0420245	1.57722	down
Acacb	0.0443164	1.90199	down
Olfr801	0.0362414	4.03057	down
Defb34	0.0221388	1.68428	down
Mcoln1	0.0120802	1.87965	down
S1pr4	0.0215954	1.68384	down
Gata1	0.0376996	4.09618	down
Olfr854	0.000196051	2.36135	down
Fam83d	0.0202945	1.5496	down
Gnb1l	0.0195525	1.58538	down
1700028K03Rik	0.00742165	2.49173	down
Mmp7	0.0256727	1.68031	down
Ntrk1	0.018915	1.72827	down
BC049635	0.014418	1.7134	down
B630019K06Rik	0.0225701	3.64709	down
Olfr1034	0.0493415	3.49405	down
Fbxo3	0.0271746	1.58656	down
Qk	0.0396356	1.51259	down
Tmem114	0.0353004	1.97564	down
Fscn3	0.0367066	1.80559	down
C4a	0.00957904	1.65862	down
Gm14374	0.0384489	3.13856	down
Musk	0.0222553	4.41958	down
H2-Q7	0.0287779	1.73131	down
Rgs9bp	0.0299854	1.54365	down
Hecw2	0.0484621	1.80579	down
Mfap3l	0.0128343	2.13827	down
Zfp961	0.0162413	1.51256	down
Scn11a	0.0428389	1.6548	down
Nppc	0.0116331	3.09101	down
Gm2016	0.0310504	2.33542	down
Glrx2	0.0348056	1.62359	down
7420426K07Rik	0.0107558	1.96866	down
Vmn1r90	0.0493472	1.76898	down
Ccdc65	0.0420091	1.74535	down
Ifi27l2a	0.0442196	1.78381	down
Olfr481	0.0252079	1.51171	down
Srd5a2	0.030967	3.24004	down
Macf1	0.0285185	1.93877	down
Zfp655	0.0303466	1.69471	down
Esyt2	0.041819	1.63872	down
Magi3	0.00188195	1.568	down
Klra2	0.0119379	1.64206	down
1300002K09Rik	0.0372884	2.15899	down
Rrm2b	0.0036958	1.52283	down
Mocos	0.0118618	1.79512	down
Acsm2	0.0227576	2.18277	down
Stx11	0.000455833	1.5503	down
Pde4a	0.000411041	1.79571	down
4930528F23Rik	0.0064582	2.16449	down
Gca	0.00446145	2.0725	down
Gm5635	0.0190729	2.15734	down
Mylip	0.0462796	2.02909	down
Gm14458	0.000775284	2.21822	down
Amigo2	0.0421457	1.97454	down
H1f0	0.0367726	1.57181	down
2310033E01Rik	0.0279954	2.10235	down
Zpbp2	0.0213841	1.51164	down
ORF63	0.038194	3.30434	down
Rgs3	0.00291874	1.8676	down
Cr2	0.0112998	1.71007	down
Olfr1168	0.0366579	1.95759	down
Vmn1r116	0.0207857	1.85042	down
Il16	0.0307992	1.86146	down
Spag4	0.0195263	1.53975	down
Dmc1	0.0230664	1.52527	down
Rax	0.0318434	1.72931	down
Hps3	0.0308438	3.43877	up
Vmn2r63	0.0250651	2.057	up
Rnf144b	0.0254097	3.45565	up
Tectb	0.0299566	2.06259	up
Fgf12	0.0410384	1.62203	up
Tgm5	0.0375668	1.72795	up
Dhrs7c	0.0441384	2.16725	up
Trpv6	0.0319773	2.21105	up
Cypt7	0.00990781	2.74615	up
Zfyve20	0.0205432	1.81212	up
Trh	0.0116326	2.72753	up
Prickle3	0.0435591	1.93512	up
Sbno1	0.0313263	1.92651	up
3110003A17Rik	0.0308344	1.54065	up
Pla2g7	0.0494678	2.94212	up
Wdr53	0.000691319	1.59772	up
Sox21	0.0251319	2.2007	up
Prdm10	0.0332038	3.21134	up
1700024G13Rik	0.0212602	2.21892	up
Slc22a3	0.0443149	3.00992	up
Arid3a	0.0368786	1.62082	up
Pcdha11	0.0489395	3.70414	up
Dpy30	0.0318077	1.90251	up
Zfp599	0.0314428	1.8597	up
Kcnj16	0.0438309	3.8088	up
Zfp449	0.0145632	3.27887	up
Usp51	0.0458336	2.32987	up
Kcna1	0.0444724	1.67596	up
Phf20l1	0.00962598	2.64687	up
Fam65b	0.0421524	1.6718	up
Olfr550	0.00988898	2.06742	up
Tspan8	0.0362858	1.61223	up
D17H6S56E-3	0.00737342	2.07069	up
Exph5	0.014333	2.41793	up
Tulp3	0.00905484	2.91293	up
Ms4a6d	0.0144697	1.54556	up
Ddx4	0.0254753	3.75965	up
Fbxo34	0.0026603	1.54375	up
Rab3gap1	0.0216902	1.80702	up
Olfr652	0.0240389	1.90053	up
Xlr5c	0.0216754	4.0876	up
2210010C17Rik	0.0260325	1.68526	up
Lrp1	0.0272558	3.95224	up
Mrgpra2a	0.0173718	1.66563	up
Rreb1	0.0478958	6.3699	up
Shc3	0.0316286	1.89017	up
Vmn2r8	0.0390267	4.19035	up
Chd7	0.0264994	3.44295	up
Tagln	0.0179943	4.59664	up
E030002O03Rik	0.0399447	1.89396	up
Tmem138	0.0485878	1.86859	up
4921517D21Rik	0.0298771	1.67179	up
Rpl34	0.00174869	1.54515	up
Hoxa1	0.0387349	1.54849	up
Pcyt1a	0.0085801	1.7245	up
Mrap2	0.0398058	3.00379	up
Ptrf	0.0422238	2.5723	up
Tox	0.0153271	2.36277	up
Fam166a	0.00371263	1.53529	up
Zbtb49	0.0392986	1.93482	up
Cldn5	0.0218966	1.58662	up
Leng8	0.00469226	2.50967	up
Lass6	0.00196053	1.79443	up
Fos	2.19903e-05	1.73672	up
Uxt	0.00108055	1.69282	up
Slc35d3	0.0168987	2.46738	up
Olfr298	0.0228479	2.92938	up
Foxg1	0.0139055	2.14334	up
Tssc4	0.03036	1.51002	up
Vps18	0.0354105	2.94197	up
Col4a1	0.00378259	3.47883	up
Chka	0.00520074	1.78203	up
2610301G19Rik	0.0142567	3.71717	up
Thra	0.0380157	2.7234	up
Gap43	0.0136535	2.12833	up
Hs2st1	0.0297685	1.58682	up
Gata6	0.0106312	4.46757	up
D18Ertd653e	0.0272693	1.86563	up
Dync1i2	0.0370888	1.70809	up
Cxx1c	0.0365956	1.50565	up
Tgm1	0.00938088	2.37807	up
Glipr1	0.00262667	4.16084	up
Folr4	0.0294703	2.42182	up
2010305A19Rik	0.0477015	3.52171	up
Clcn3	0.0300835	1.8308	up
Ergic2	0.0258811	1.83337	up
Tnrc6a	0.0128138	1.57822	up
Zfp239	0.0162833	3.15151	up
Pex19	0.00503882	2.02913	up
Gata4	0.0317543	2.38535	up
Pcsk6	0.00980456	2.2865	up
Zfp276	0.0270825	1.76982	up
Fabp5	0.0311953	1.82808	up
Timm17a	0.0252558	1.59317	up
Clca1	0.00312097	1.52231	up
Oasl2	0.00625184	1.64543	up
Hectd2	0.0287885	5.07863	up
Lpar6	0.0413784	3.18861	up
Kctd17	0.0240728	1.62893	up
Slc2a10	0.0188432	3.59912	up
Mobp	0.0197961	2.06264	up
Thap2	0.031174	1.79876	up
Rgp1	0.0267662	2.24063	up
Manf	0.0114051	1.52081	up
Raet1a	0.00483612	2.84795	up
Dab2	0.0408646	3.54794	up
Foxq1	0.0297533	2.91866	up
Larp7	0.0114263	2.08346	up
Sp3	0.0167771	2.16161	up
Esf1	0.0158641	1.65566	up
Pknox1	0.0246611	1.74589	up
Olfr888	0.023572	5.05365	up
Rcan1	0.00872374	2.07639	up
Srsf12	0.0130906	1.71966	up
Zfp551	0.0329208	2.03602	up
Dzip1	0.027916	1.72877	up
Timp1	0.0371498	1.67019	up
Gm8267	0.0401958	2.55732	up
Ttc9b	0.025871	1.6585	up
Zdhhc16	0.00242598	1.52321	up
Bsn	0.0369127	1.50326	up
Gm12597	0.0192271	2.28366	up
2410089E03Rik	0.0238459	2.22012	up
Entpd2	0.0427127	3.25502	up
Xlr5a	0.000329296	3.89695	up
Dcaf12l1	0.0210408	1.52304	up
Ccnd2	0.00777125	4.81514	up
Mafg	0.0343804	2.08926	up
Gdpd5	0.00169799	2.45729	up
Tmem47	0.0193578	2.66608	up
Gas2l1	0.00493647	2.14217	up
Hnrnpul2	0.0382264	1.75923	up
Rgs3	0.0319376	1.51429	up
Spna2	0.0309691	2.22467	up
Map4k3	0.0440388	2.63594	up
Sssca1	0.00688794	1.68834	up
Mapk11	0.000288038	1.50409	up
Cntrob	0.0142349	3.36815	up
Hhip	0.023209	2.34398	up
Slc37a4	0.0245904	3.39016	up
Ppara	0.0109844	1.97536	up
Parva	0.00999774	2.32117	up
Spdef	0.0440833	1.72051	up
Calml4	0.00178031	1.84028	up
Scml2	0.0409335	1.75643	up
Trim39	0.0261735	2.84767	up
Klk1b16	0.048157	1.89919	up
Lrrc28	0.00372685	1.59856	up
2010109I03Rik	0.0027981	1.85061	up
H2-Ke2	0.0234684	1.5697	up
Tspan8	0.0406664	2.69486	up
Sdf2l1	0.00311071	1.55791	up
Spna1	0.0485771	1.51103	up
Nox4	0.0459432	2.45707	up
Phf13	0.0291193	2.95474	up
Zfp583	0.0210354	2.35619	up
Rpl35a	0.00339719	1.57735	up
Trim8	0.0115043	1.55411	up
Btg1	0.031348	1.5876	up
Habp2	0.00708119	2.1204	up
1700093K21Rik	0.0317186	1.54356	up
Dact1	0.0427646	3.24024	up
Olfr1282	0.0321921	1.59428	up
Creb3	0.0357607	1.64978	up
Muc5b	0.0156397	2.04456	up
Mta3	0.016583	1.68599	up
Daxx	0.0219312	5.16256	up
Krt23	0.0494891	3.89469	up
Bcor	0.00449617	1.76475	up
Pitx2	0.00638808	2.08893	up
Unc13b	0.00443952	2.46279	up
BC003331	0.027607	1.73129	up
Cep120	0.0488205	1.75299	up
Serpinb9f	0.0442647	1.79637	up
Oxr1	0.00883925	1.98393	up
Zfp608	0.0291964	1.9606	up
Cpa2	0.0292712	2.98374	up
Amn	0.0142699	3.07197	up
Tcfap2d	0.0285296	1.907	up
Nostrin	0.0393475	4.71466	up
1110001A16Rik	0.000696086	1.55973	up
Fli1	0.0340662	4.41788	up
Slc25a21	0.0476265	2.6247	up
Ccdc93	0.039449	1.71949	up
Ppp4c	0.0458715	3.81139	up
Ldha	0.0168446	1.64589	up
Ephb2	0.0236128	3.25883	up
Huwe1	0.0443639	1.59798	up
Gpr97	0.00826398	3.33061	up
Il7r	0.0491084	1.50357	up
Helz	0.0211772	2.58578	up
Hkdc1	0.0171775	2.64597	up
App	0.0367567	2.63281	up
Sdccag3	0.0423313	3.69267	up
Tmed11	0.00545524	1.79104	up
Krt18	0.0321649	1.98406	up
Cebpz	0.0287851	2.31658	up
Cd40	0.0214012	3.85999	up
Jam3	0.0140919	1.52548	up
Tcerg1l	0.0247715	2.45887	up
Phf17	0.0393635	1.62029	up
B3galtl	0.0120057	2.15798	up
Mgrn1	0.0457923	1.53991	up
Fam84b	0.0143758	1.95224	up
Tead4	0.0489982	2.40978	up
Eltd1	0.0297726	2.14324	up
Cpsf4l	0.029867	2.01078	up
Get4	0.0190992	1.92779	up
E330009J07Rik	0.0111018	1.54705	up
4930420K17Rik	0.0040351	2.17968	up
Mapk6	0.00152632	1.55299	up
Msln	0.00321149	1.99885	up
Iqsec1	0.0025855	2.07415	up
Pnpla3	0.0301429	2.96389	up
Stambpl1	0.00928776	1.54174	up
Serping1	0.047626	1.59498	up
Dync1i2	0.0228782	1.59042	up
Zfp266	0.0365774	1.72874	up
Ptger3	0.00291004	1.83638	up
Arl4d	0.0181581	1.64269	up
Tshz2	0.00393093	1.68521	up
Thbs1	0.0233328	1.94804	up
Islr2	0.0121432	1.79273	up
Btla	0.0314428	1.50544	up
Efna1	0.02467	1.56051	up
Atg2a	0.0403214	1.7034	up
Purb	0.031354	3.692	up
Plekhh2	0.00754214	1.53415	up
Zfp326	0.0469035	2.69975	up
Ube3a	0.0488923	2.31015	up
Lpin1	0.0020638	2.26349	up
Atl2	0.0289706	2.01996	up
Bche	0.0403603	1.53067	up
S100a6	0.0323543	2.30364	up
Met	0.00645446	1.81853	up
Scn3a	0.0109067	1.62786	up
Eef1b2	0.0320537	1.93856	up
Btbd7	0.0317194	1.5134	up
Tecta	0.0274015	1.53897	up
Nucks1	0.00673377	1.72189	up
Mlst8	0.0324766	2.04253	up
Ank3	0.022817	1.54455	up
Zfp36l2	0.0108185	1.77743	up
Adm	0.0434713	2.4727	up
Xlr5b	0.00317747	3.75613	up
3110007F17Rik	0.0163381	1.55185	up
Slc2a2	0.0148987	2.10381	up
Med1	0.0422189	2.7342	up
Grk6	0.031337	1.53807	up
Pkia	0.0277774	3.89341	up
Por	0.0498093	2.23467	up
Serpinb8	0.0140383	1.62883	up
P2rx6	0.0444015	2.83898	up
Nucks1	0.0164511	1.85519	up
Selp	0.00392269	1.60656	up
P4ha2	0.0371411	2.13811	up
Zfp52	0.010714	1.60008	up
Tomt	0.0350684	1.60625	up
Pdgfc	0.0417513	1.5492	up
Thsd4	0.0306238	1.62257	up
Slc45a2	0.0310156	2.4037	up
Cldn6	0.031775	1.87119	up
Synpo2l	0.04561	3.83789	up
Cd72	0.0318249	1.63955	up
Olfr543	0.0487714	1.86592	up
Foxp3	0.0213742	1.5057	up
Gadd45a	0.00166998	1.91578	up
Spaca3	2.7351e-06	1.89196	up
Ptges3	0.0475244	1.76708	up
Fam19a2	0.00332522	2.96709	up
Rcbtb2	0.0268659	1.5951	up
Srbd1	0.0445495	1.52232	up
Olfr1062	0.0100495	1.51788	up
Eps15	0.0271416	1.69567	up
Phactr4	0.0102592	1.91007	up
Tmem87a	0.0127787	2.82099	up
Psap	0.0295992	1.50624	up
Arhgef5	0.00503416	1.79014	up
Haghl	0.0123184	1.98772	up
Rrp12	0.0299659	6.21282	up
Ube2q2	0.02686	2.40974	up
Ncoa7	0.0290615	3.23332	up
2010003K15Rik	0.00228522	1.73821	up
Olfr857	0.0476106	3.85771	up
Klk1b9	0.0170735	1.61366	up
Zfp180	0.00687649	1.70859	up
Lcor	0.00860279	2.41122	up
Dse	0.0139364	1.91411	up
Sfpi1	0.0331359	2.57912	up
Cxcl2	0.012183	1.95374	up
Nrp2	0.0499491	1.73438	up
Actg2	0.0344011	2.05975	up
1700008P02Rik	0.00509976	3.14967	up
Abhd2	0.00175883	2.23408	up
D330045A20Rik	0.032674	1.62692	up
Olfr54	0.0222428	2.15581	up
Zhx3	0.000204452	3.08384	up
Supt4h1	0.0412966	1.54071	up
Pclo	0.0214293	1.68063	up
Ttc27	0.0198852	2.29561	up
Dedd	0.00779376	5.3166	up
Cyp2a4	0.00286707	1.69289	up
1700016D06Rik	0.0294082	1.82432	up
Tnfaip1	0.00143615	1.55599	up
Pbx1	0.0333852	2.27086	up
Anapc10	0.0388359	1.50008	up
Vkorc1	0.0471534	1.62618	up
Jakmip2	0.00617142	2.71564	up
Ceacam12	0.0446411	2.90618	up
Cdk12	0.0247282	1.68274	up
Serpina3m	0.0462782	6.8491	up
Fam57a	0.00875435	1.66522	up
Spem1	0.0101787	1.58201	up
Ptpra	0.0253401	1.94984	up
Olfr1024	0.0181256	2.43556	up
Esr2	0.00946241	1.53381	up
Mgst3	0.000498785	2.21533	up
Myc	0.0359529	1.68003	up
4930550L24Rik	0.0275864	2.00113	up
Gad1	0.00845564	1.82654	up

## Sheet: TabelS2_SOX2 PPIs
SOX2 interactors and their association ratios between fSOX2-Tg and fS248A-Tg cells				Previously identified SOX2 interactions
Gene	negLOG10(adj. p-val) FLAG/HA-IP	log2(fS48A-Tg Int./fSOX2-Tg Int.)	z score (fS48A-Tg/fSOX2-Tg)	Cox et al.	Gao et al	Mallana et al.	Engelen et al
Ddx42	2.28479	-23.4224	-20.1086
Pla2g6	2.35918	-23.0224	-19.7612
Ran	2.35918	-21.9861	-18.8611
G3bp1	2.0867	-21.8851	-18.7733
Mycbp	2.46401	-21.8838	-18.7722
Prmt5	2.35918	-21.6841	-18.5987
Pcbp2	2.35918	-21.3113	-18.2749
Prpf3	2.35918	-21.2208	-18.1963
Wdr82	2.38848	-20.2913	-17.389
Rpl26	2.35918	-19.0047	-16.2714
Gatad2b	2.12436	-6.66	-5.54873				Engelen et al.
Srsf2	2.38848	-6.66	-5.54873
Dnmt1	2.08466	-3.72	-2.99504
Rps16	2.35918	-3.61986	-2.90805
Rsrc2	2.35918	-3.22786	-2.56756
Sh3d21	1.72194	-3.13107	-2.48349
Ybx1	2.38848	-2.98117	-2.35328
mCG_18601	2.26252	-2.38909	-1.839
Gm9000	2.12436	-2.17389	-1.65208
Dhx15	2.08466	-2.14149	-1.62394
Hmga1	2.12436	-2.12713	-1.61146
Mta2	2.46401	-2.05478	-1.54862				Engelen et al.
Uba52	2.38848	-1.93402	-1.44373
Dkc1	2.08466	-1.91645	-1.42846
Rps19	2.35918	-1.85437	-1.37454
Srrm1	2.38848	-1.8502	-1.37092
Eif4a1	2.0867	-1.80973	-1.33576
Morf4l2	2.46401	-1.7251	-1.26226
Tpx2	2.38848	-1.68831	-1.2303
Khsrp	2.12436	-1.67749	-1.2209
IMA2	2.12436	-1.55202	-1.11191
Serpina3k	2.35918	-1.53596	-1.09797
Ppib	2.35918	-1.51973	-1.08387
Gm17430	2.12436	-1.50068	-1.06733
Rps13	2.35918	-1.48276	-1.05176
Rps7	2.35918	-1.47749	-1.04718
Smc2	2.16561	-1.471	-1.04154
Serbp1	2.35918	-1.4568	-1.02921
Usp48	2.38848	-1.44504	-1.01899
Serpina1b	2.35918	-1.37464	-0.957849
Eef1d	2.08466	-1.35741	-0.94288
KV2A7	2.12436	-1.35505	-0.940825
Hmgb1	2.12436	-1.33532	-0.923691
Ddx46	2.28479	-1.3021	-0.89484
Hp	2.12436	-1.29187	-0.885954
Hbb-b2	2.12436	-1.28212	-0.877484
Rbm17	2.35918	-1.26738	-0.864675
Rbm3	2.35918	-1.26495	-0.862564
Srsf5	2.38848	-1.21415	-0.818439
Hcfc1	2.12436	-1.21216	-0.816718
Sart1	2.35918	-1.1597	-0.771145
Nono	2.46401	-1.14528	-0.75862
Wdr76	2.38848	-1.14121	-0.755083
Ruvbl1	2.35918	-1.13178	-0.746894				Engelen et al.
Rfc1	2.35918	-1.12792	-0.743541		Gao et al.
Hmgn1	2.12436	-1.12127	-0.737766
Sf1	2.35918	-1.10879	-0.726925
Snrnp40	2.16561	-1.10447	-0.723176
Prpf40a	2.35918	-1.09462	-0.714619
Rpl27	2.35918	-1.07935	-0.701358
Rsl1d1	2.35918	-1.07515	-0.697707
Myh1	2.46401	-1.07504	-0.697609
Prpf38a	2.35918	-1.06813	-0.691613
Hpx	2.12436	-1.06369	-0.687749
Hnrnpa0	2.12436	-1.06233	-0.686572
Eif2s1	2.08466	-1.06001	-0.684556
Mybbp1a	2.46401	-1.00351	-0.635477
Map4	2.26252	-1.00286	-0.634919
Eif1a	2.08466	-0.994563	-0.627709
Rps20	2.35918	-0.989232	-0.623078
Prp19	2.35918	-0.968019	-0.604652
Trim28	2.38848	-0.961752	-0.599209
Ddx52	2.08466	-0.949143	-0.588257
Pin4	2.35918	-0.932616	-0.573901
Smarca4	2.16561	-0.932209	-0.573547
Prmt1	2.35918	-0.924985	-0.567273
Csrp2	2.17509	-0.912707	-0.556608
Hist1h1d	2.12436	-0.899287	-0.544951
L1td1	2.10469	-0.892939	-0.539438
Gm20425	2.12436	-0.879063	-0.527385
Psrc1	2.35918	-0.869429	-0.519017
Rps11	2.35918	-0.850255	-0.502362
Prdx1	2.35918	-0.845692	-0.498398
Kifc5b	2.12436	-0.837868	-0.491603
Eif5b	2.0867	-0.823149	-0.478818
Hnrnpu	2.12436	-0.820557	-0.476566
Nudt21	2.46401	-0.820505	-0.476521
Hist1h1a	2.12436	-0.819502	-0.47565		Gao et al.
Rbmx	2.35918	-0.81505	-0.471783
Tcof1	2.38848	-0.811306	-0.468531
Sf3b3	2.35918	-0.798866	-0.457725
Rps9	2.35918	-0.787032	-0.447446
Gm6793	2.12436	-0.778136	-0.439719
Smarcc1	2.16561	-0.776862	-0.438613				Engelen et al.
Pspc1	2.35918	-0.740992	-0.407456
Dek	2.08466	-0.729244	-0.397252
Srsf11	2.38848	-0.727604	-0.395827
Srrm2	2.38848	-0.722721	-0.391586
Wtap	2.38848	-0.720424	-0.38959
Rpsa	2.35918	-0.70481	-0.376028
Copb1	2.17509	-0.701611	-0.373249
Snrnp70	2.16561	-0.67996	-0.354443
Hist1h1b	2.12436	-0.671589	-0.347172
Rps15a	2.35918	-0.660934	-0.337917
Eef1a1	2.08466	-0.641979	-0.321453
Fbl	2.0867	-0.632043	-0.312822
Tardbp	2.38848	-0.630351	-0.311353
Gtf2i	2.12436	-0.620026	-0.302384
Nolc1	2.46401	-0.61087	-0.294431
Puf60	2.35918	-0.6076	-0.291591
Hmgn2	2.12436	-0.584234	-0.271295
Nop2	2.46401	-0.578739	-0.266522
Pzp	2.35918	-0.578692	-0.266481
Hmgb2	2.12436	-0.568561	-0.257682
Rpl38	2.35918	-0.555257	-0.246125
Nsrp1	2.46401	-0.526856	-0.221456
Ddx5	2.28479	-0.526729	-0.221346
Gm11353	2.12436	-0.522241	-0.217447
Hnrnpm	2.12436	-0.517292	-0.213149			Mallana et al.
Snrpd3	2.16561	-0.485902	-0.185883
Hnrnpa2b1	2.12436	-0.463622	-0.166531
H3f3a	2.12436	-0.443712	-0.149237
Stk38l	2.38848	-0.439287	-0.145393
Sarnp	2.35918	-0.432539	-0.139532
U2surp	2.38848	-0.425123	-0.133091
Hnrnpa1	2.12436	-0.417942	-0.126853
Sf3b2	2.35918	-0.416126	-0.125275
Numa1	2.30526	-0.413864	-0.123311
Ddx23	2.17509	-0.410543	-0.120426
Sfpq	2.35918	-0.389544	-0.102186
IGKC	2.12436	-0.383724	-0.0971315
Rps18	2.35918	-0.373036	-0.0878471
Top1	2.38848	-0.37005	-0.0852537			Mallana et al.
Trip12	2.38848	-0.369153	-0.0844745
Incenp	2.12436	-0.357527	-0.074376
Serpina1a	2.35918	-0.344553	-0.0631068
Ighg1	2.12436	-0.343927	-0.062563
Flna	2.0867	-0.342763	-0.0615522
Eif3i	2.0867	-0.332016	-0.052217
Hnrnpk	2.12436	-0.331624	-0.0518764
Ncl	2.46401	-0.331127	-0.0514451
Gm5449	2.12436	-0.328152	-0.0488609
Rps14	2.35918	-0.327619	-0.0483979
Srp72	2.38848	-0.319346	-0.0412121
Eif4b	2.0867	-0.307937	-0.0313024
Fus	2.0867	-0.303003	-0.0270166
Fam133b	2.0867	-0.297877	-0.022564
Mug2	2.46401	-0.29061	-0.016252
Top2a	2.38848	-0.274899	-0.00260564		Gao et al.
Lsm14a	2.10469	-0.262221	0.008407
Snrpd1	2.16561	-0.258807	0.0113723
Eftud2	2.08466	-0.240595	0.0271914
Luc7l2	2.10469	-0.239382	0.0282452
Rbbp7	2.35918	-0.230532	0.0359318		Gao et al.		Engelen et al.
Tpm3	2.38848	-0.200625	0.0619098
Eif3a	2.08466	-0.184457	0.075953
Hdac6	2.12436	-0.182675	0.0775012
Prpf8	2.35918	-0.157651	0.0992366
Prpf31	2.35918	-0.152773	0.103474
Ywhaq	2.38848	-0.149826	0.106034
Mfap1	2.26252	-0.149164	0.106609	Cox et al.
Eef1g	2.08466	-0.141728	0.113068
Kng1	2.12436	-0.129959	0.12329
Cpsf6	2.17509	-0.124197	0.128295
Frg1	2.0867	-0.119501	0.132374
Rbm14	2.35918	-0.109869	0.14074			Mallana et al.
Nhp2l1	2.46401	-0.0934092	0.155038
Sf3b4	2.35918	-0.0865643	0.160983
Fkbp3	2.0867	-0.0656176	0.179178
Serf2	2.35918	-0.062984	0.181465
Rif1	2.35918	-0.0609321	0.183247
Hsp90aa1	2.12436	-0.0593321	0.184637
Rcc2	2.35918	-0.0564316	0.187157
Rnps1	2.35918	-0.0528081	0.190304
D1Pas1	2.17509	-0.0475043	0.194911
Tma7	2.38848	-0.0424766	0.199278
Pcbp1	2.35918	-0.0409208	0.200629
Pnkp	2.35918	-0.0331076	0.207416
Nop56	2.46401	-0.0315941	0.208731
Fam32a	2.0867	-0.0220496	0.217021
Sall4	2.35918	-0.00795373	0.229265		Gao et al.	Mallana et al.
Thrap3	2.38848	0	0.236173
Txn	2.38848	0.00323112	0.23898
Cp	2.17509	0.00393983	0.239595
Rps4y2	2.35918	0.0452062	0.27544
Luc7l3	2.10469	0.0483216	0.278146
Poldip3	2.35918	0.0594079	0.287775
Kif4	2.12436	0.0633136	0.291168
Sf3b5	2.35918	0.120164	0.340548
Hnrnpl	2.12436	0.121555	0.341757
Eif5a	2.0867	0.127988	0.347344
Tubb2b	2.38848	0.131598	0.35048
Sf3a1	2.35918	0.140301	0.358039
Erh	2.0867	0.141326	0.35893
SSRP1	2.38848	0.156686	0.372271		Gao et al.
Cwc25	2.17509	0.196455	0.406815
Ewsr1	2.0867	0.201371	0.411085
Nop58	2.46401	0.203373	0.412824
Hnrnpf	2.12436	0.217085	0.424735
Rfc3	2.35918	0.235584	0.440802
G	2.0867	0.2479	0.4515
Ppil4	2.35918	0.251845	0.454927
Snrpn	2.16561	0.267266	0.468322
Znf706	2.38848	0.273171	0.473451
Morc3	2.46401	0.279283	0.47876
Phf3	2.35918	0.281749	0.480902
Hspa5	2.12436	0.310083	0.505513
Rpl8	2.35918	0.310749	0.506091
Rps10-ps1	2.35918	0.347554	0.538061
Prpf6	2.35918	0.359953	0.54883
Ruvbl2	2.35918	0.364945	0.553166			Mallana et al.	Engelen et al.
Npm1	2.46401	0.366369	0.554403
Rbm39	2.35918	0.378778	0.565182
Npm3	2.46401	0.38255	0.568458
Mob1b	2.30365	0.407119	0.589799
Sf3b1	2.35918	0.425867	0.606083
Ddx39b	2.28479	0.441384	0.619562
Otud4	2.35918	0.448502	0.625744
Gm6576	2.12436	0.452718	0.629407
Snrnp200	2.16561	0.457176	0.633278
Rps25	2.35918	0.461048	0.636642
Prpf38b	2.35918	0.467976	0.642659
Psip1	2.35918	0.476591	0.650143
Rpl11	2.35918	0.479391	0.652574
Lyar	2.26252	0.481509	0.654414		Gao et al.
Mthfd1l	2.46401	0.496012	0.667012
Rbm10	2.35918	0.529999	0.696533
Hspa8	2.12436	0.531522	0.697856
Hist1h2bc	2.12436	0.557539	0.720455
Ssb	2.38848	0.56052	0.723044	Cox et al.
Setx	2.35918	0.562055	0.724377
Dpy30	2.08466	0.577657	0.737929
Trim21	2.38848	0.589153	0.747915
Xrcc1	2.38848	0.591179	0.749674		Gao et al.
Lrrfip2	2.10469	0.595652	0.753559
Tmod3	2.38848	0.602248	0.759289
Ddx17	2.17509	0.610443	0.766407
Stk38	2.38848	0.623904	0.778099
Syncrip	2.38848	0.652773	0.803175
Tuba1b	2.38848	0.654708	0.804855
Gm6788	2.12436	0.665159	0.813933
Psmb6	2.35918	0.69114	0.836501
Rps3	2.35918	0.700447	0.844584
Flii	2.0867	0.730485	0.870676
Rpl18	2.35918	0.747125	0.88513
Vcp	2.38848	0.768869	0.904017
Supt16h	2.38848	0.786363	0.919212			Mallana et al.	Engelen et al.
Sub1	2.38848	0.820251	0.948647
Hist2h2aa1	2.12436	0.820722	0.949056			Mallana et al.
Tcp1	2.38848	0.837317	0.963471
Snrpb2	2.16561	0.887247	1.00684
Ubtf	2.38848	0.90459	1.0219
Mmtag2	2.26252	0.931942	1.04566
rp9	2.35918	0.932514	1.04616
Eif3f	2.0867	0.940783	1.05334
Hnrnpd	2.12436	1.1251	1.21344
Hnrnpc	2.12436	1.19224	1.27176
Pou5f1	2.35918	1.21	1.28718
Hist1h4a	2.12436	1.24739	1.31966
U2af1	2.38848	1.26901	1.33844
Hsp90ab1	2.12436	1.30806	1.37236
Gar1	2.0867	1.50729	1.54541
Dsp	2.08466	1.5195	1.55601
Tyms	2.38848	1.52442	1.56029
Lig3	2.10469	1.53274	1.56752		Gao et al.
Rpa1	2.35918	1.61385	1.63797		Gao et al.	Mallana et al.
Tdp1	2.38848	1.69154	1.70545		Gao et al.
Msh2	2.46401	1.74	1.74755
Snrpe	2.16561	1.92049	1.90432
Krt76	2.12436	2.19759	2.14501
Hnrnpab	2.12436	2.34079	2.2694
Xrcc6	2.38848	2.55	2.45112			Mallana et al.
Xpo4	2.38848	2.65803	2.54495		Gao et al.	Mallana et al.
Parp2	2.35918	2.83198	2.69604		Gao et al.
Hdac2	2.12436	2.95	2.79856				Engelen et al.
Xrcc5	2.38848	3.12	2.94622		Gao et al.	Mallana et al.
Rpl13a	2.35918	16.9953	14.9984
Smu1	2.16561	18.4667	16.2764
Farsa	2.0867	18.9681	16.712
Hltf	2.12436	19.0573	16.7895
Copz1	2.17509	19.1142	16.8389
Dpf2	2.08466	19.2686	16.973
Rps17	2.35918	19.326	17.0228
Msh6	2.46401	19.37	17.061
Fam60a	2.0867	19.533	17.2026
Polb	2.35918	19.561	17.2269		Gao et al.	Mallana et al.
Snrpa1	2.16561	19.6586	17.3117
Hist1h1e	2.12436	19.708	17.3546
Rpl13	2.35918	19.7319	17.3754
Smarcd1	2.16561	19.8053	17.4392		Gao et al.		Engelen et al.
Skp1	2.16561	19.8199	17.4518
Eif3d	2.08466	19.9043	17.5251
Smarce1	2.16561	19.9187	17.5377
Rrp1b	2.35918	20.0158	17.622
Rpl3	2.35918	20.0315	17.6356
Slc4a1ap	2.16561	20.0414	17.6442
Rpl18a	2.35918	20.0989	17.6942
Gm10020	2.12436	20.1625	17.7494
Mta3	2.46401	20.1969	17.7793	Cox et al.
Mbd3	2.26252	20.2042	17.7856				Engelen et al.
Phf8	2.35918	20.2474	17.8231
Rbpms2	2.35918	20.3397	17.9034			Mallana et al.
Med19	2.26252	20.4799	18.0251
Ik	2.12436	20.5128	18.0537
Myl6	2.46401	20.5164	18.0568
Lsm4	2.10469	20.557	18.0921
Parp1	2.35918	20.5763	18.1089			Mallana et al.
Hspa9	2.12436	20.6025	18.1316
Gatad2a	2.0867	20.9188	18.4064	Cox et al.			Engelen et al.
Rps24	2.35918	20.9401	18.4249
Sumo2	2.38848	21.0391	18.5109
Set	2.35918	21.0587	18.5279
Phf5a	2.35918	21.2111	18.6602
Csnk2a1	2.17509	21.2954	18.7334
Rbbp6	2.35918	21.4272	18.8479
Gpr128	2.12436	21.5648	18.9674
Morf4l1	2.46401	21.7615	19.1383
Rpl31	2.35918	21.7937	19.1663
U2af2	2.38848	22.0138	19.3575
Serpina1d	2.35918	22.1843	19.5055
Spin1	2.38848	22.329	19.6313
Gm5160	2.12436	22.5707	19.8412
Srp14	2.38848	22.8166	20.0548
Rbpsuh-rs3	2.35918	22.8513	20.0849
Khdrbs1	2.12436	23.1155	20.3144
Prodh2	2.35918	23.5371	20.6806
Try10	2.38848	24.1098	21.1781
Prss1	2.35918	27.681	24.28
Hsfy2	2.12436	29.7881	26.1102

## Sheet: TableS3_Peps_targeted coIPs
Peptides used for target MS analysis of SOX2 interactors
Protein	Peptide sequence	m/z
HDAC1	YYAVNYPLR	579.801
HDAC2	FNVGEDCPVFDGLFEFCQLSTGGSVAGAVK	1031.82
HDAC2	YGEYFPGTGDLR	687.82
DNMT1	YQQHPEDAVDEPQMLTSEK	749.007
DNMT1	VPALASPAGSLPDHVR	529.626
MORF4L2	ADPTVESEEAFK	661.809
MORF4L2	NLDPALPGR	476.764
SIN3A	AFLEILHTYQK	454.919
SIN3A	QEELVQQVR	564.804
MBD3	LSGLSAFDIAEELVR	810.436
MTA3	AVGTFAR	361.203
MTA3	DFNDIRQDFLPWK	565.283
GATAD2A	LQNAASATALVSR	651.362
GATAD2A	GVLHTFSQSPK	400.884
GATAD2A	LLQQGVGTASIK	607.859
MTA2	QTFLLQTTK	540.308
MTA2	QPSLHMSAAAASR	442.891
GATAD2B	TPVVQNAASIVQPSPAHVGQQGLSK	838.454
GATAD2B	VIAPNPAQLQGQR	696.391
PRMT1	ATLYVTAIEDR	626.333
PRMT1	EQLDNQLDAYM(Oxidation)SK	785.856
SOX2	SEASSSPPVVTSSSHSR	567.94
SOX2	SEASSSPPVVTSSSHSR+ HexNAc	635.633
SOX2	SEASSS(Phospho)PPVVTSSSHSR	594.595
SOX2	AEASSSPPVVTSSSHSR	562.608
SOX2	AEASSSPPVVTSSSHSR+HexNAc	630.301
SOX2	AEASSS(Phospho)PPVVTSSSHSR	589.263
SOX2	LGAEWK	352.192
SOX2	LLSETEK	410.227

## Sheet: TableS4_Primers
Primers used in this study
Mutagenic primers for Sox2
Sox2S248Af	ggtcGCCtccgaggccagctcca
Sox2S248Ar	cggaGGCgaccacagagcccatggag
RT-qPCR primers
Pou4f2rtF	TGGACATCGTCTCCCAGAGTA
Pou4f2rtR	GTGTTCATGGTGTGGTAAGTGG
Fgf1rtF	CAGCTCAGTGCGGAAAGTG
Fgf1rtR	TGTCTGCGAGCCGTATAAAAG
Gata4rtF	CCCTACCCAGCCTACATGG
Gata4rtR	ACATATCGAGATTGGGGTGTCT
Sox21rtF	CAAAAAGGACAAGTTCGCCTTC
Sox21rtR	GAGCAGAGACTCGGGAACC
Fgf3rtF	TGCGCTACCAAGTACCACC
Fgf3rtR	CACTTCCACCGCAGTAATCTC
Gata1rtF	TGTCCTCACCATCAGATTCCA
Gata1rtR	TCCCTCCATACTGTTGAGCAG
GfaprtF	CGGAGACGCATCACCTCTG
GfaprtR	AGGGAGTGGAGGAGTCATTCG
Gata6rtF	GCCGGAGGAAATGTACCAGAC
Gata6rtR	CCCCTTGAAGGTAGGGCAG
Tcf3	GGGTGCCAGCGAGATCAAG
Tcf3	ATGAGCAGTTTGGTCTGCGG
Pbx1rtF	GAAGAGACGGAATTTCAACAAGC
Pbx1rtR	CTGTGACAGCCGTTTTGGC
Dnmt3b	AGCGGGTATGAGGAGTGCAT
Dnmt3b	GGGAGCATCCTTCGTGTCTG
Pou3f1rtF1	TCGAGGTGGGTGTCAAAGG
Pou3f1rtR1	GGCGCATAAACGTCGTCCA
Pou5f1rtF	CAAATCGGAGACCCTGGTG
Pou5f1rtR	CCTTCTCTAGCCCAAGCTGA
Ccnd2rtF	GAGTGGGAACTGGTAGTGTTG
Ccnd2rtR	CGCACAGAGCGATGAAGGT
NanogrtF	CCAGTCCCAAACAAAAGCTC
NanogrtR	ATCTGCTGGAGGCTGAGGTA
ToxrtF	GCTCCCGTTCCATCCACAAA
ToxrtR	TCCCAATCTCTTGCATCACAGA
Dppa3rtF	AGAGAAGGGTCCGCACTTTG
Dppa3rtR	TCACTGTCCCGTTCAAACTCA
MuskrtF	TACAGAGGGGAGGTGTGTGAT
MuskrtR	TCCCGGTAGGAGGTGTTGAA
GusBrtF	CCTTGGCTTTGTGAACTCTTG
GusBrtR	GAACCTCCAGTAGAACAGTCAG
Sox21rtF2	CCTACTCACTGCTCGACCTG
Sox21rtR2	TTGCACGGGATCATGTAGCC
FLAGrtF	ATGGACTACAAGGACCACGACG
SOX2rtR	CGGCGGCTTCAGCTCCG
SOX2rtR2	CCATCATGTTATAGACTCGAGCGGC
Mll3rtF1	GGTCTCTGTTGGCGTAGAAGC
Mll3rtR1	AAGGTAAGTCCAGGTGTTACTCT
Mll3rtF2	GCCACAGTCCCCTATGAAGGA
Mll3rtR2	GGGAAGGATATGGGAGGTGATG
Mll5rtF1	TTCAGACCTCCTGTAGAGAGC
Mll5rtR1	AAAAGTCCTCGCATCAACACA
Mll5rtF2	AGATGCACTTACAATCAAGAGGG
Mll5rtR2	AGGGCTGGTATAACCAATAGTCT
