# Supplementary figures and images for: SOX2 O-GlcNAcylation alters its protein-protein interactions and genomic occupancy to modulate gene expression in pluripotent cells
Source: eLife journal article supplement (doi:10.7554/elife.10647), 2016-03-07

Figure 1- figure supplement 2

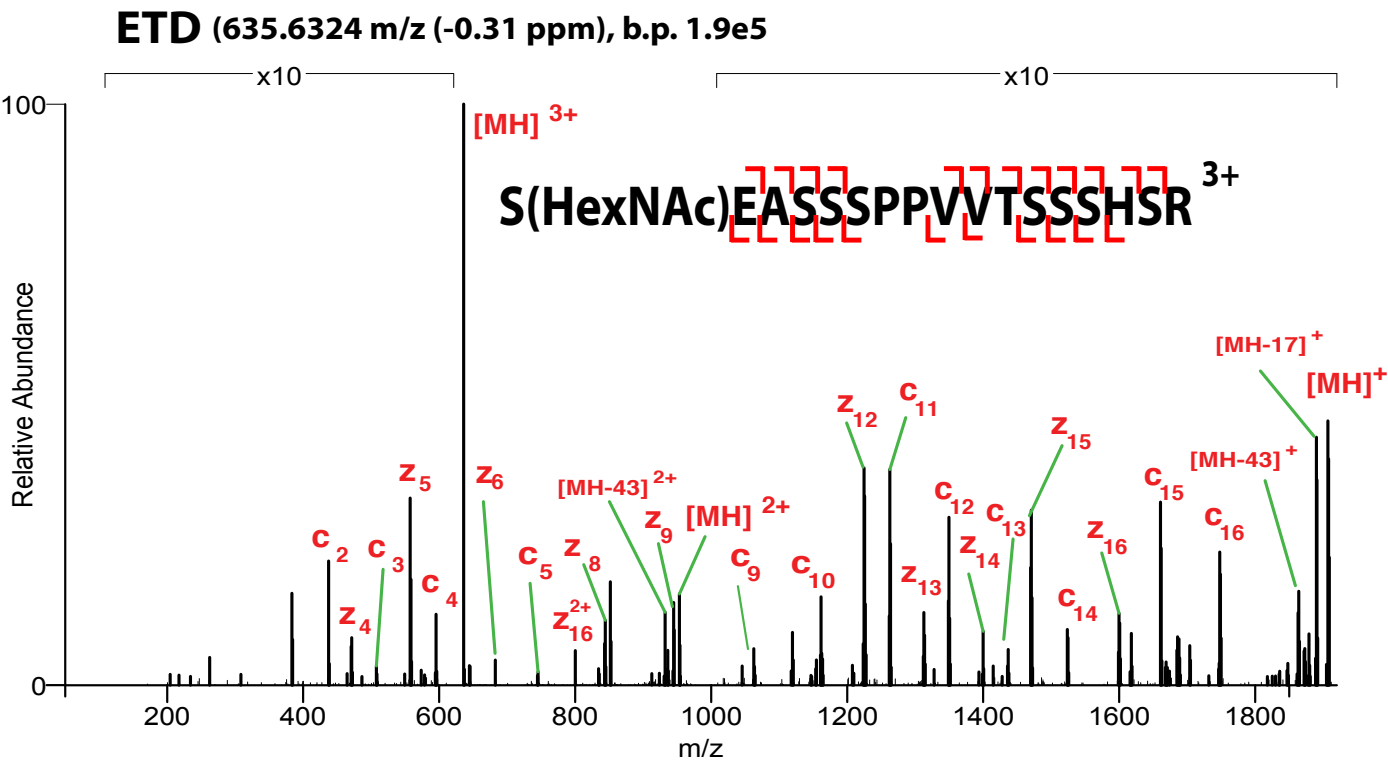

Supplement: supp [file elife-10647-supp-v1.zip › elife_poa_e10647_Figure_1_figure_supplement_2.pdf]

Figure 2- figure supplement 1

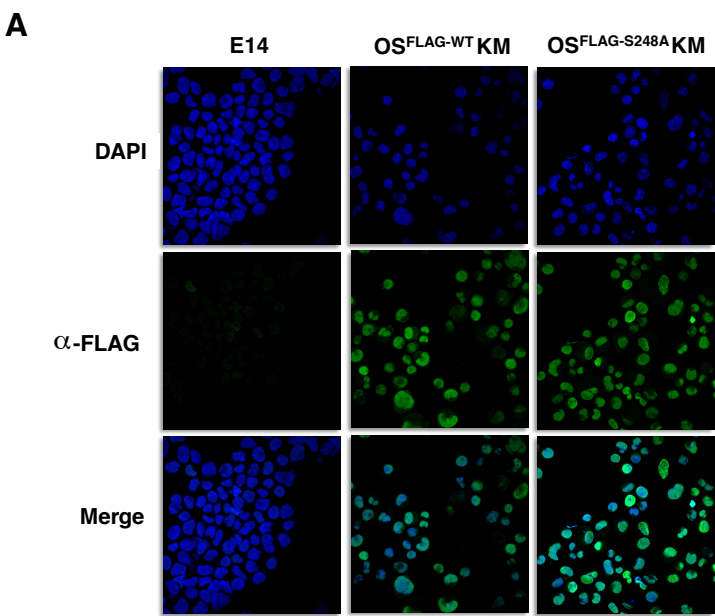

Supplement: supp [file elife-10647-supp-v1.zip › elife_poa_e10647_Figure_2_figure_supplement_1.pdf]

Figure 6- figure supplement 2

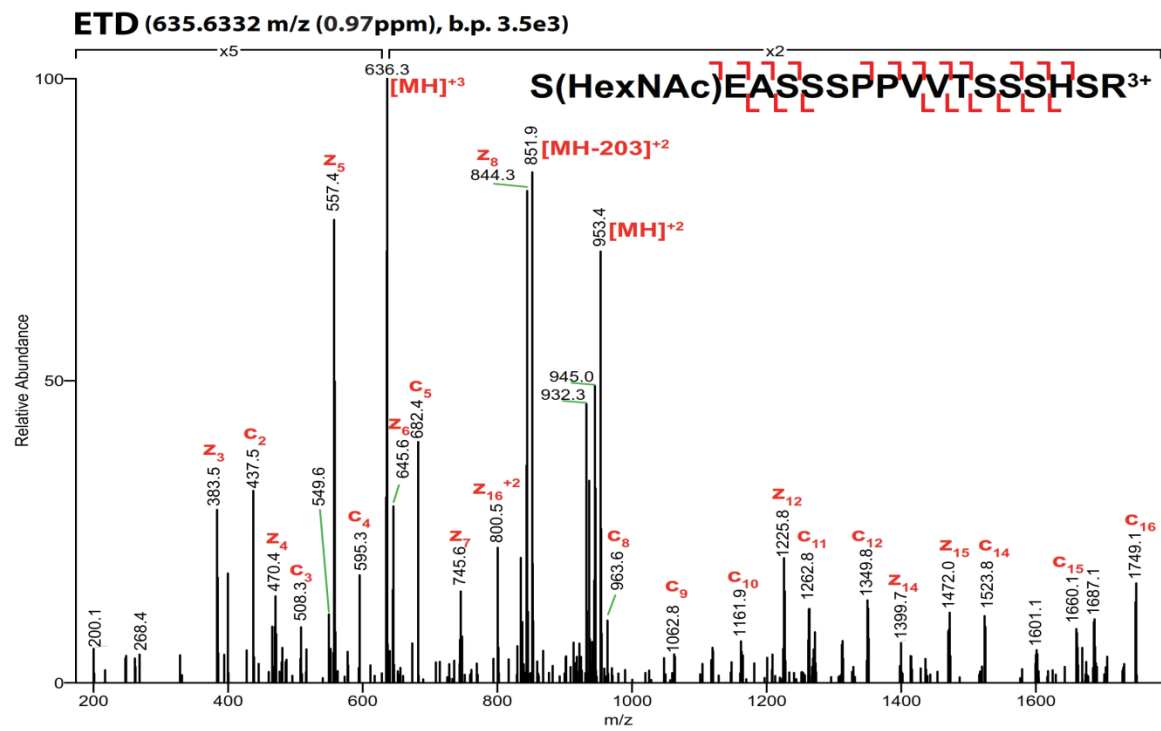

Supplement: supp [file elife-10647-supp-v1.zip › elife_poa_e10647_Figure_6_figure_supplement_2.pdf]

Figure 1- figure supplement 3

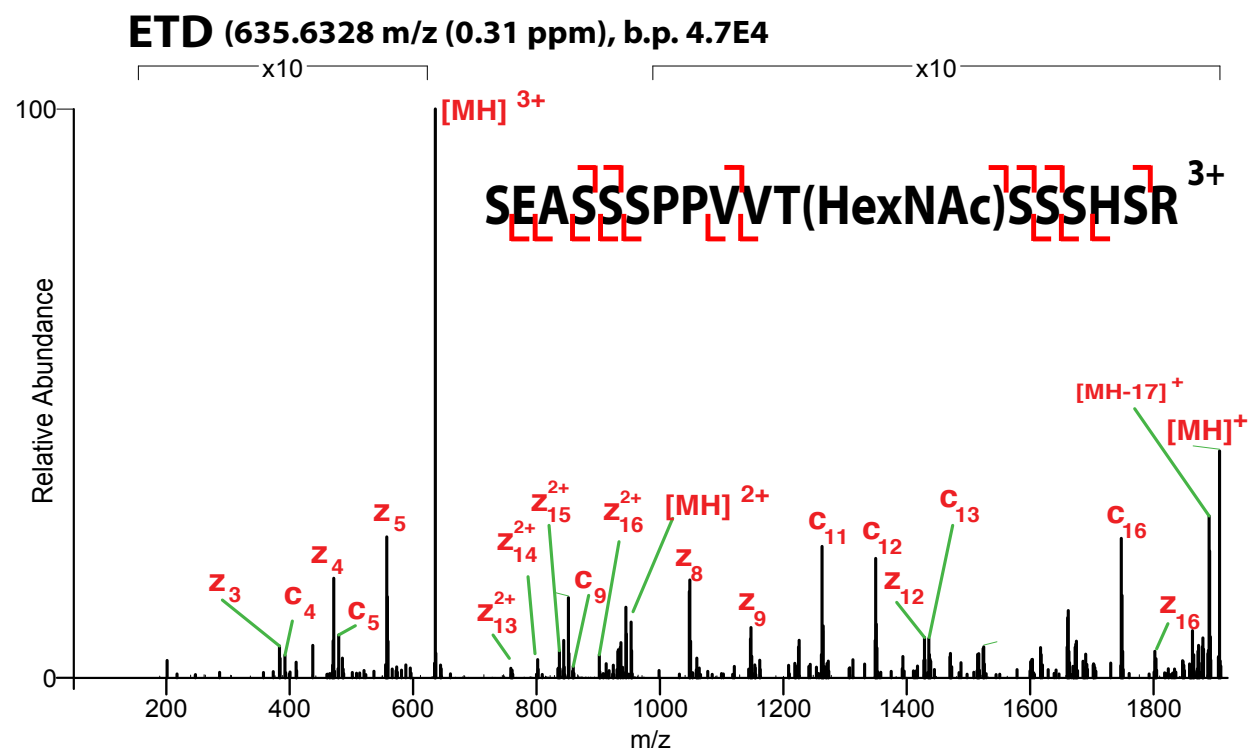

Supplement: supp [file elife-10647-supp-v1.zip › elife_poa_e10647_Figure_1_figure_supplement_3.pdf]

Figure 1- figure supplement 7

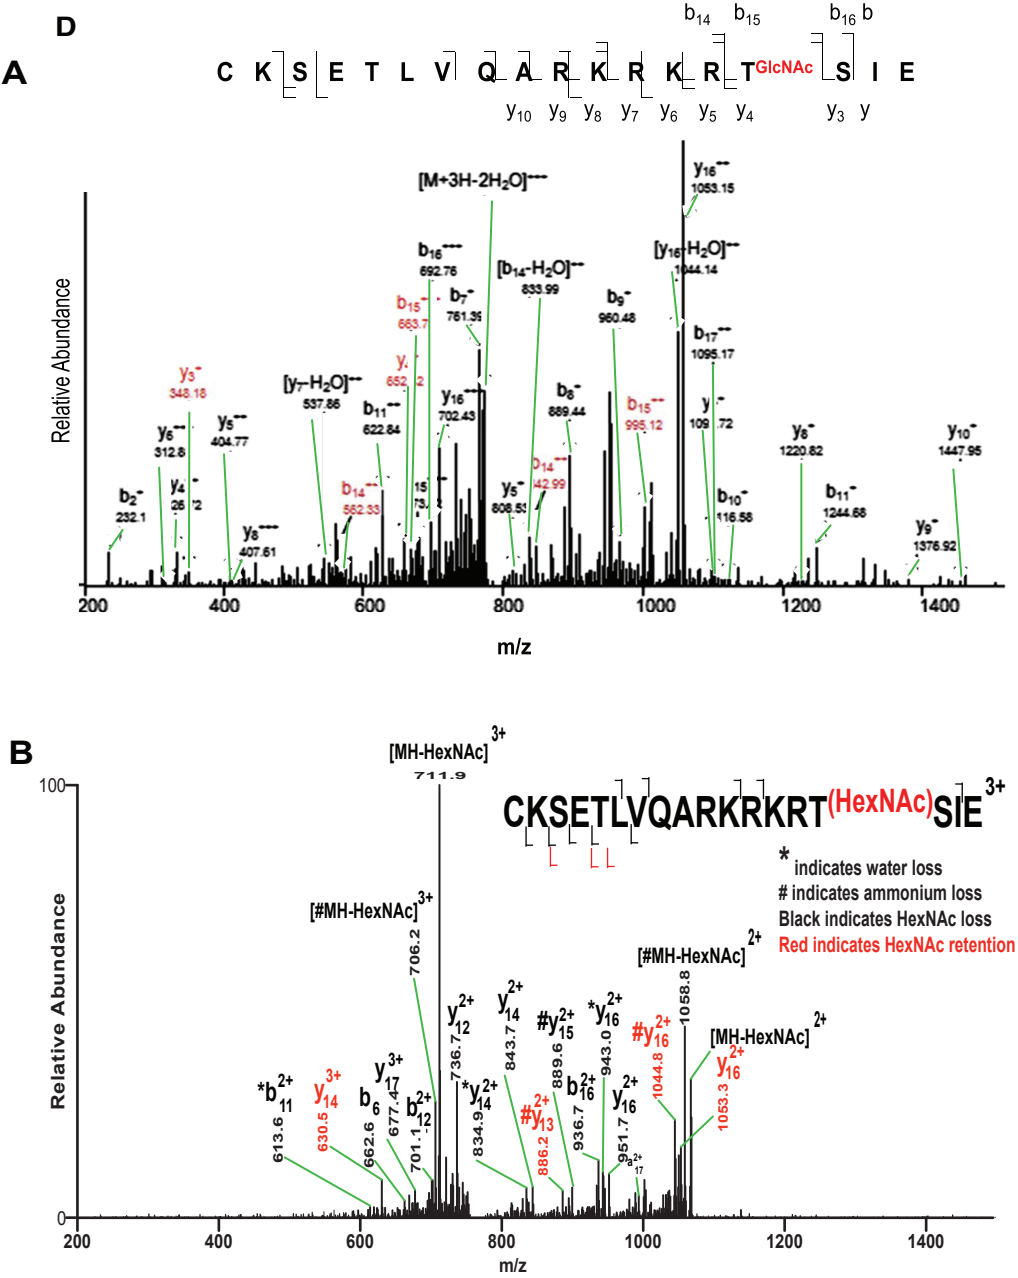

Supplement: supp [file elife-10647-supp-v1.zip › elife_poa_e10647_Figure_1_figure_supplement_7.pdf]

Figure 3- figure supplement 2

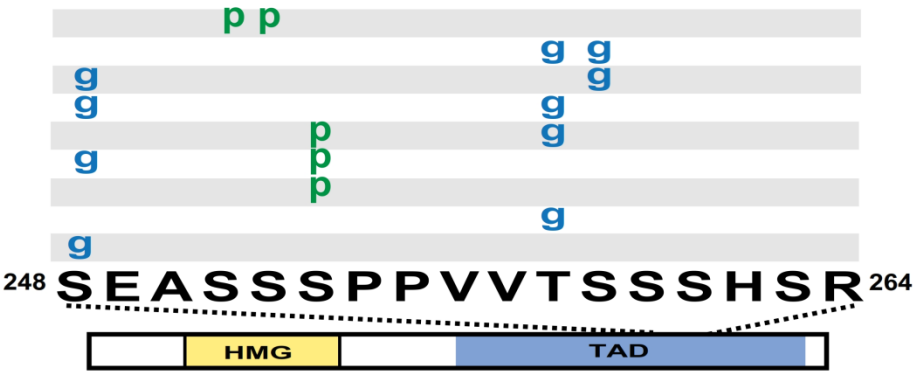

Supplement: supp [file elife-10647-supp-v1.zip › elife_poa_e10647_Figure_3_figure_supplement_2.pdf]

Figure 4- figure supplement 1

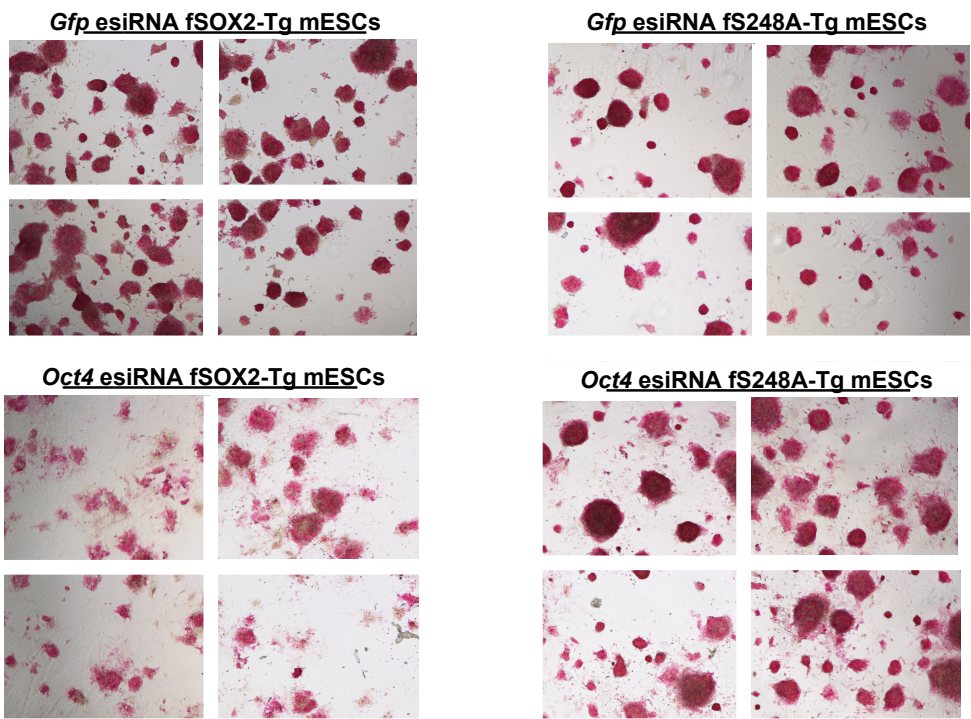

Supplement: supp [file elife-10647-supp-v1.zip › elife_poa_e10647_Figure_4_figure_supplement_1.pdf]

Figure 1- figure supplement 6

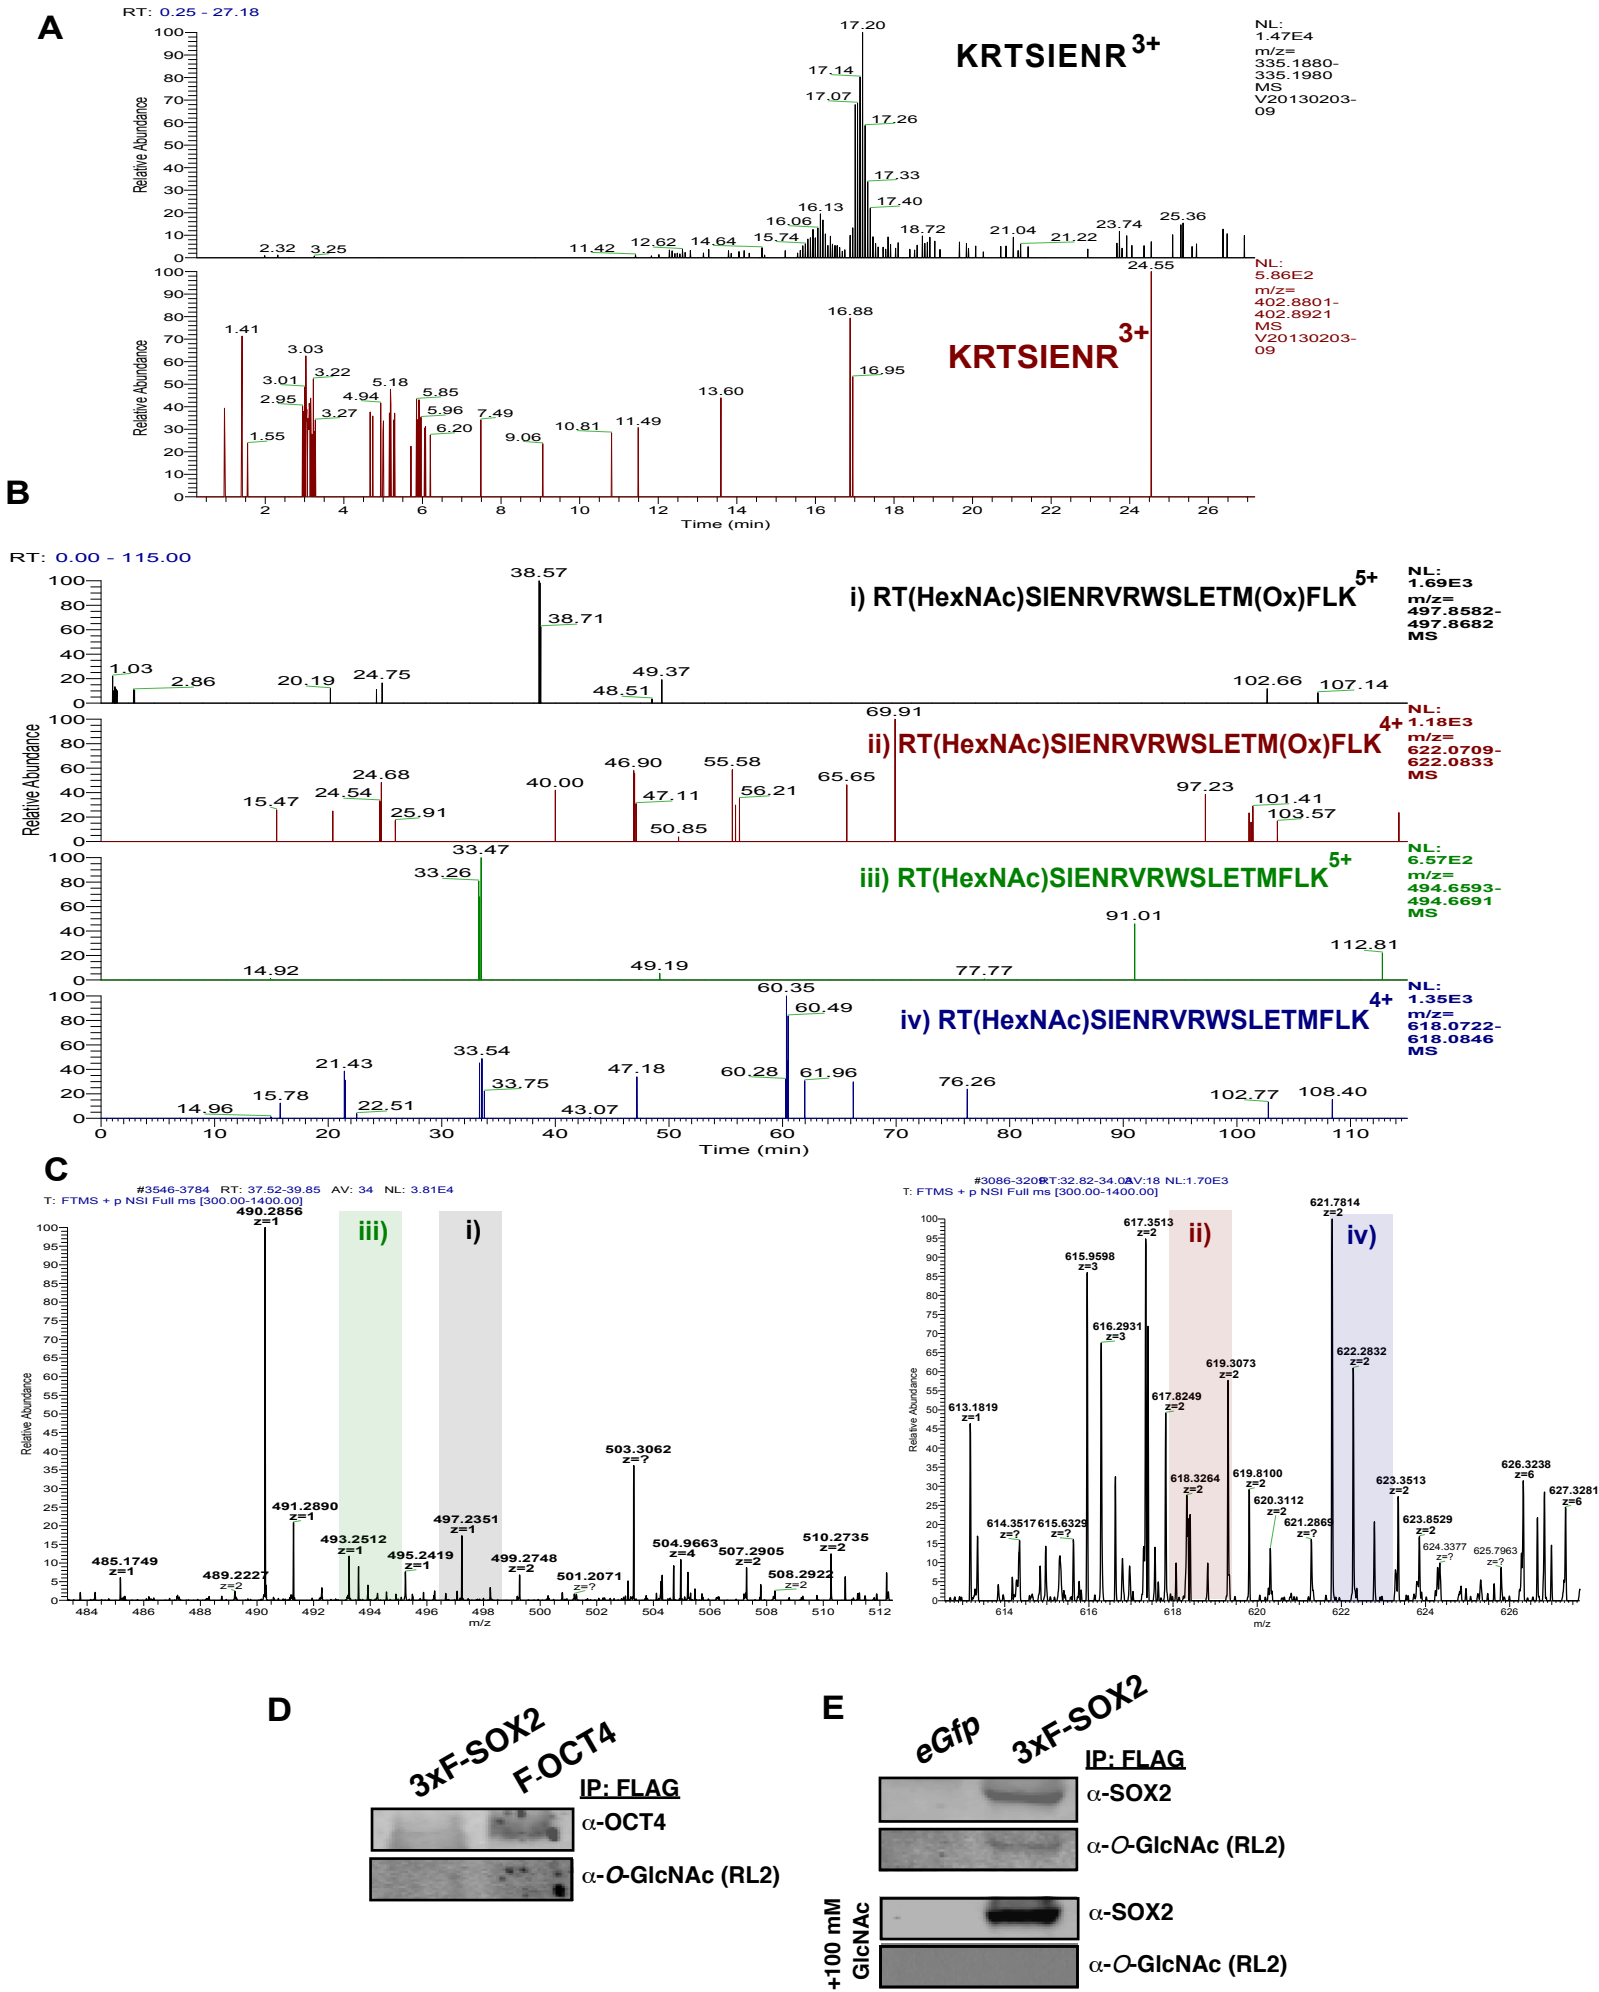

Supplement: supp [file elife-10647-supp-v1.zip › elife_poa_e10647_Figure_1_figure_supplement_6.pdf]

Figure 1- figure supplement 4

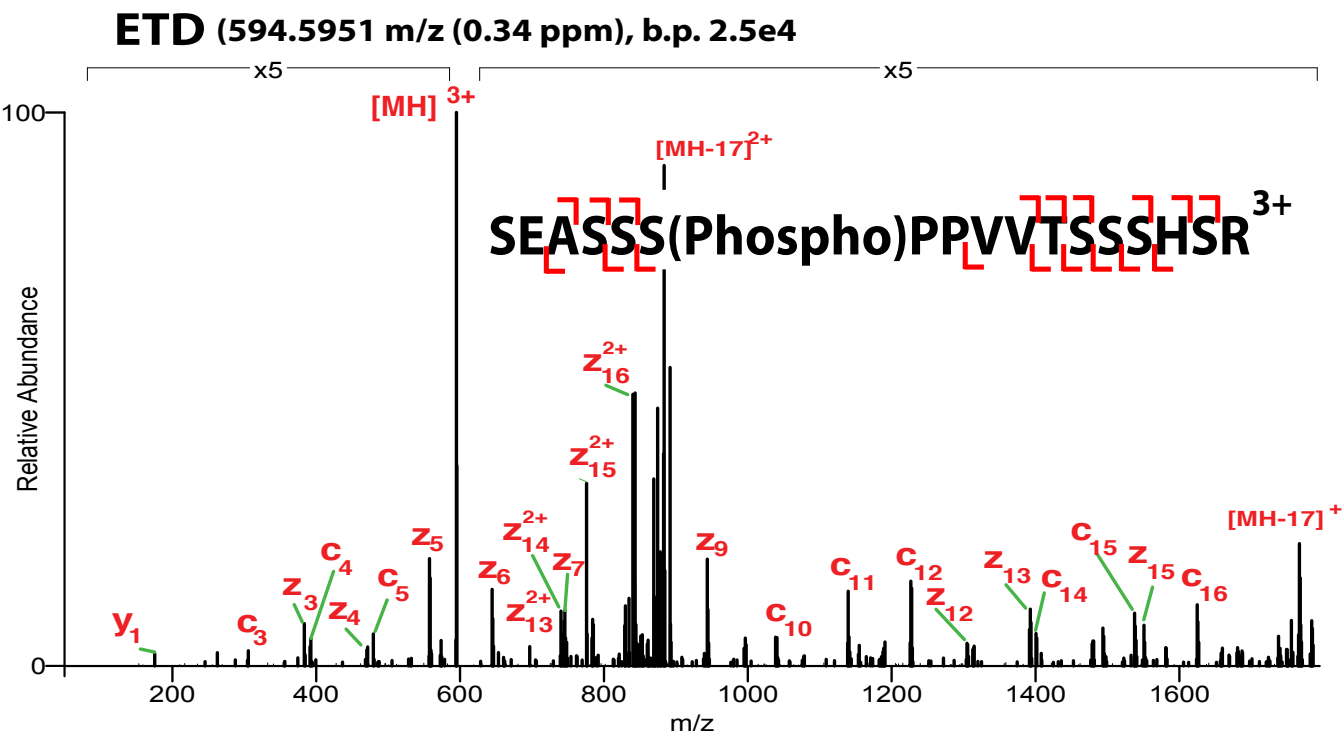

Supplement: supp [file elife-10647-supp-v1.zip › elife_poa_e10647_Figure_1_figure_supplement_4.pdf]

Figure 1- figure supplement 5

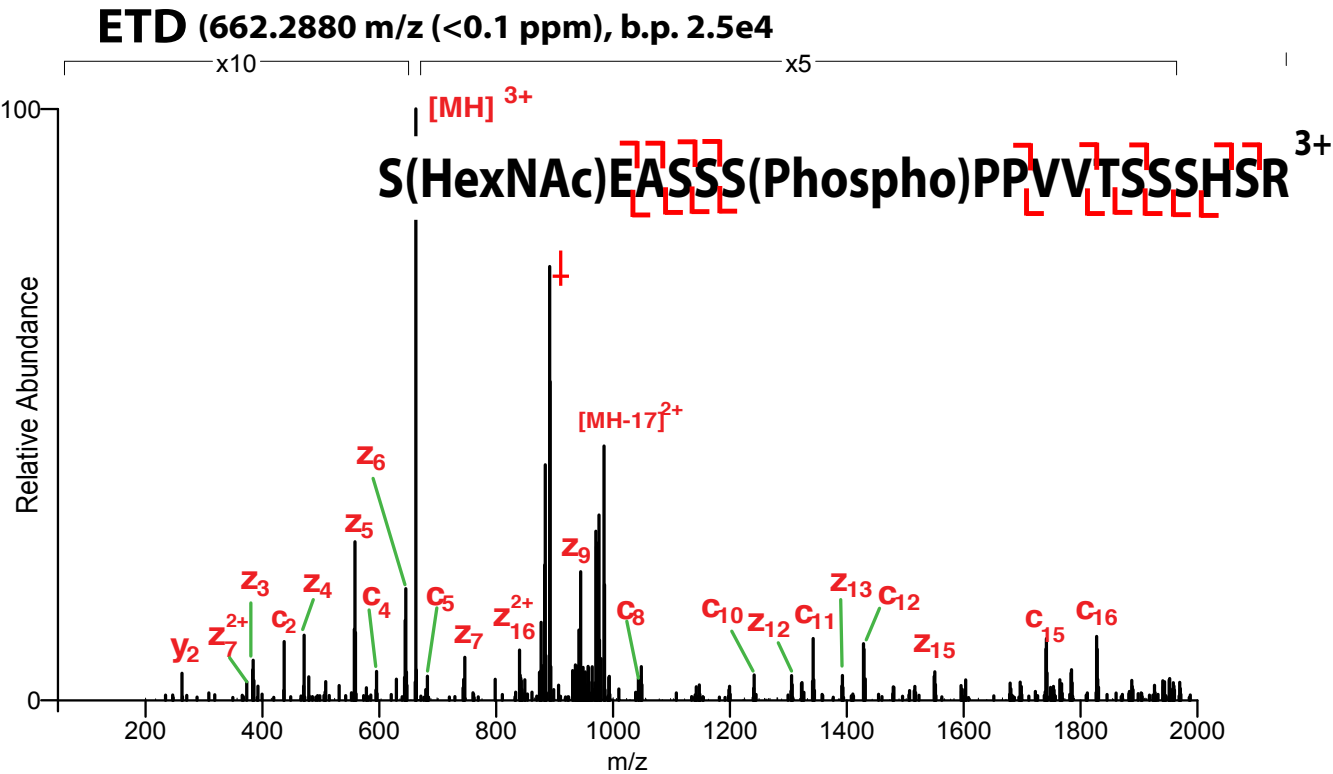

Supplement: supp [file elife-10647-supp-v1.zip › elife_poa_e10647_Figure_1_figure_supplement_5.pdf]

Figure 3- figure supplement 3

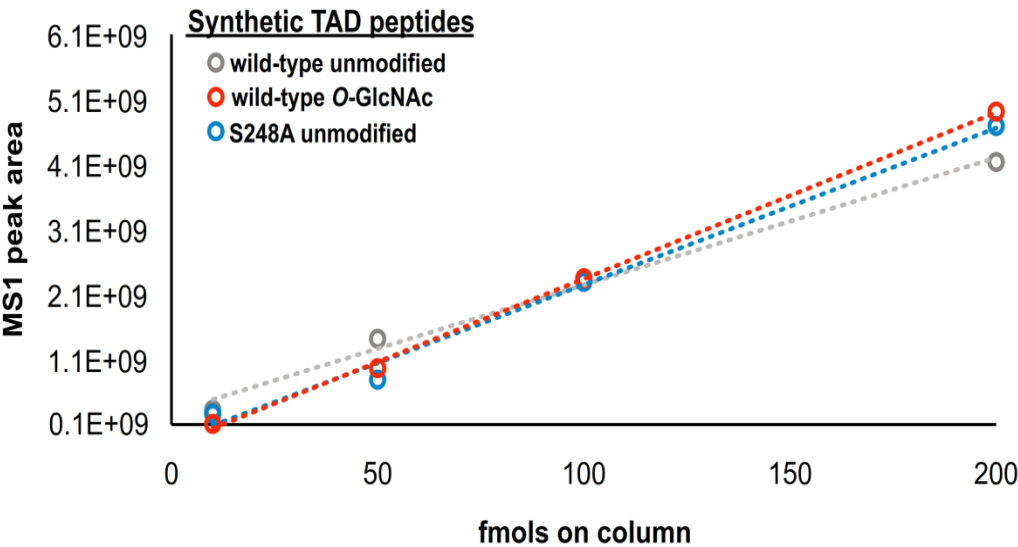

Supplement: supp [file elife-10647-supp-v1.zip › elife_poa_e10647_Figure_3_figure_supplement_3.pdf]

Figure 1- figure supplement 1

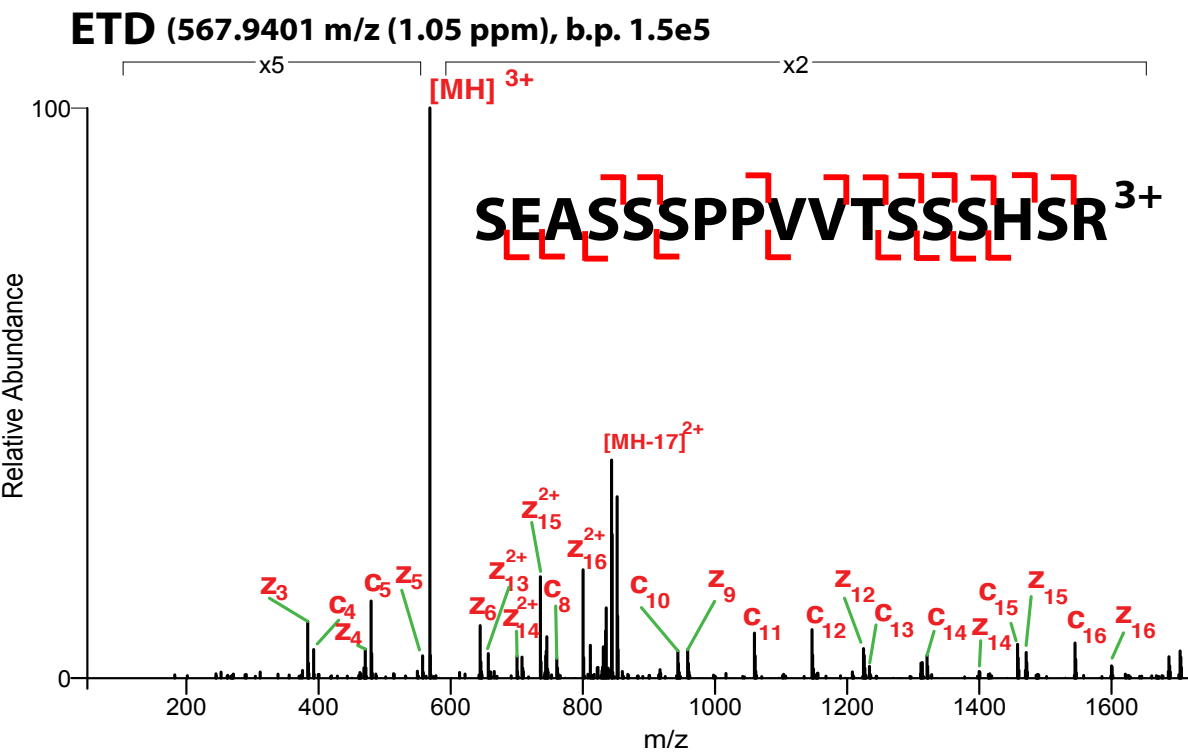

Supplement: supp [file elife-10647-supp-v1.zip › elife_poa_e10647_Figure_1_figure_supplement_1.pdf]
